# Supplementary material
Source: PubMed Central journal article supplement (PMC9992092)
Supplement: NIHMS1855563-supplement-1.pdf [file NIHMS1855563-supplement-1.pdf]

## A. BT-549/tet-MUC1shRNA

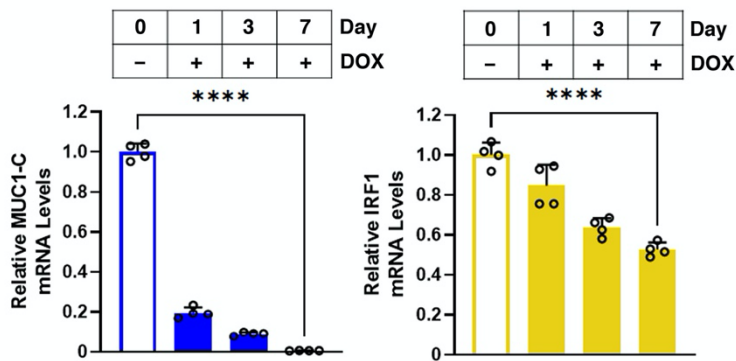

## B.

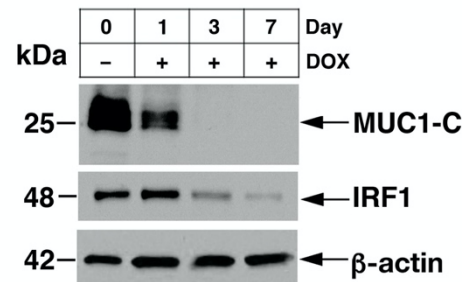

## C. MDA-MB-436/tet-MUC1shRNA

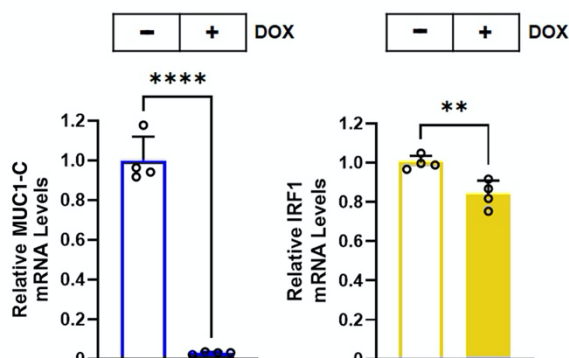

## D.

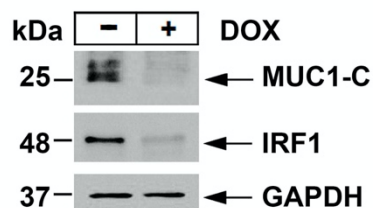

**Supplemental Figure S1. Silencing MUC1-C downregulates IRF1 expression in TNBC cells. A and B.** BT-549/tet-MUC1shRNA cells treated with vehicle or DOX for 7 days were analyzed for MUC1-C and IRF1 mRNA levels using qRT-PCR (A). The results (mean±SD and individual values) are expressed as relative mRNA levels compared to those obtained in the control vehicle-treated cells (assigned a value of 1). Lysates were immunoblotted using antibodies against the indicated proteins (B). **C and D.** MDA-MB-436/tet-MUC1shRNA cells treated with DOX vehicle for 7 days were analyzed for MUC1 and IRF1 mRNA levels by qRT-PCR (C). The results (mean ± SD and individual values) are expressed as relative mRNA levels compared to those obtained in control vehicle-treated cells (assigned a value of 1). Lysates were immunoblotted using antibodies against the indicated proteins (D).

### A. BT-549/tet-MUC1shRNA

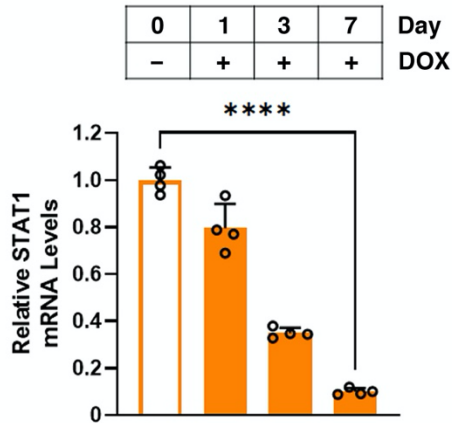

### B.

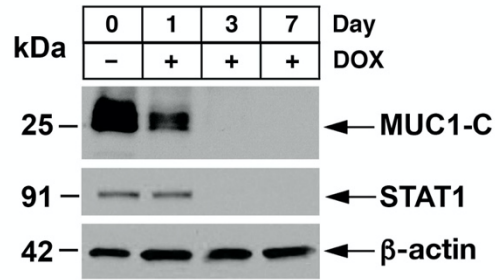

### C. MDA-MB-436/tet-MUC1shRNA

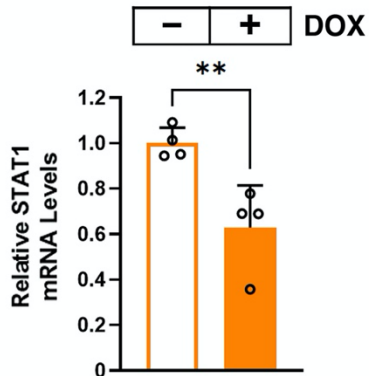

### D.

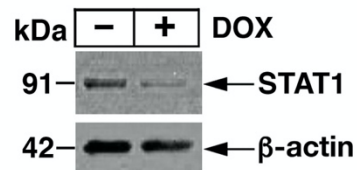

### E. BT-549

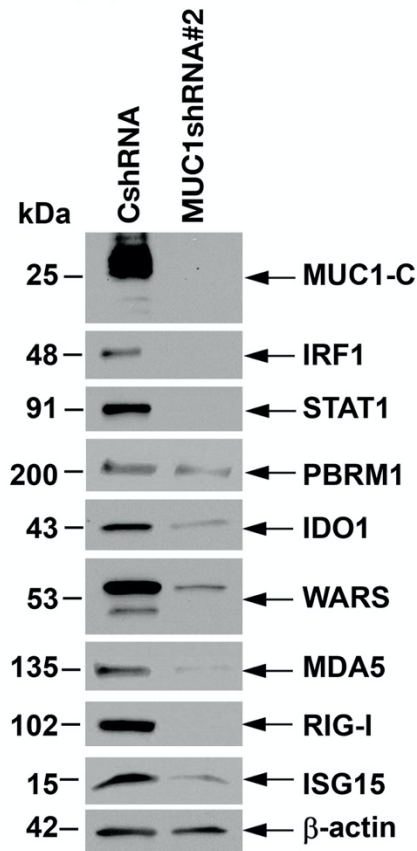

### F. BT-549/tet-MUC1shRNA

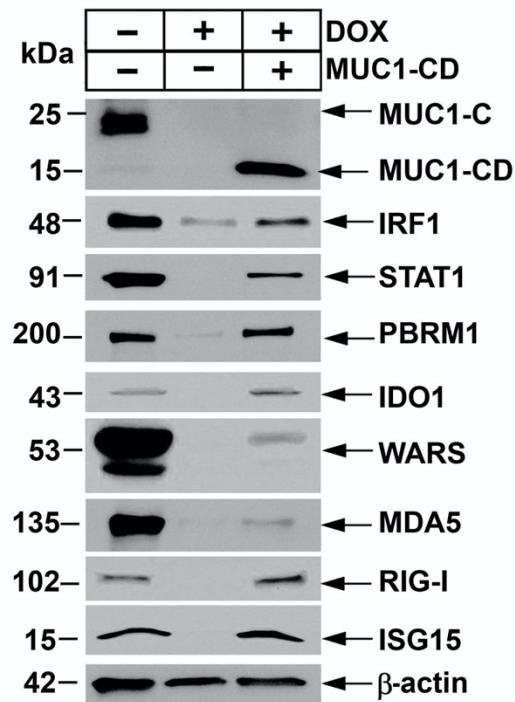

**Supplemental Figure S2. Effects of silencing MUC1-C on TNBC cells. A and B.** BT-549/tet-MUC1shRNA cells treated with vehicle or DOX for the indicated days were analyzed for STAT1 mRNA levels using

qRT-PCR (**A**). The results (mean $\pm$ SD and individual values) are expressed as relative mRNA levels compared to those obtained in the control vehicle-treated cells (assigned a value of 1). Lysates were immunoblotted using antibodies against the indicated proteins (**B**). **C and D**. MDA-MB-436/tet-MUC1shRNA cells treated with vehicle or DOX for 7 days were analyzed for STAT1 mRNA levels using qRT-PCR (**C**). The results (mean $\pm$ SD and individual values) are expressed as relative mRNA levels compared to those obtained in the control vehicle-treated cells (assigned a value of 1). Lysates were immunoblotted using antibodies against the indicated proteins (**D**). **E**. Lysates from BT-549/CshRNA and BT-549/MUC1shRNA#2 cells were immunoblotted with antibodies against the indicated proteins. **F**. BT-549/tet-MUC1shRNA cells were transfected to express the tet-MUC1-C cytoplasmic domain (MUC1-CD) and treated with the vehicle or DOX for 7 days. Lysates were immunoblotted using antibodies against the indicated proteins.

### A. MDA-MB-436/tet-MUC1shRNA

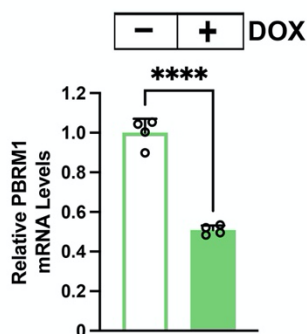

### B.

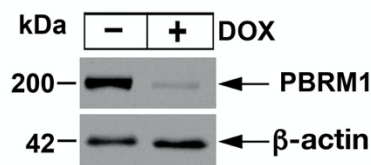

### C. BT-549

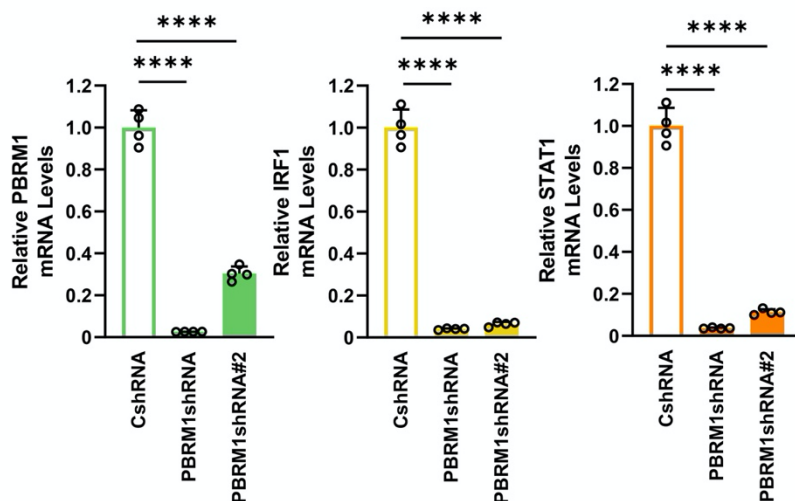

### D.

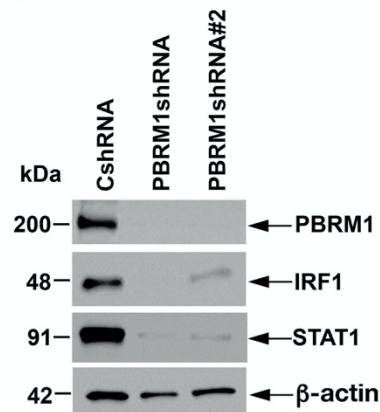

### E. MDA-MB-436

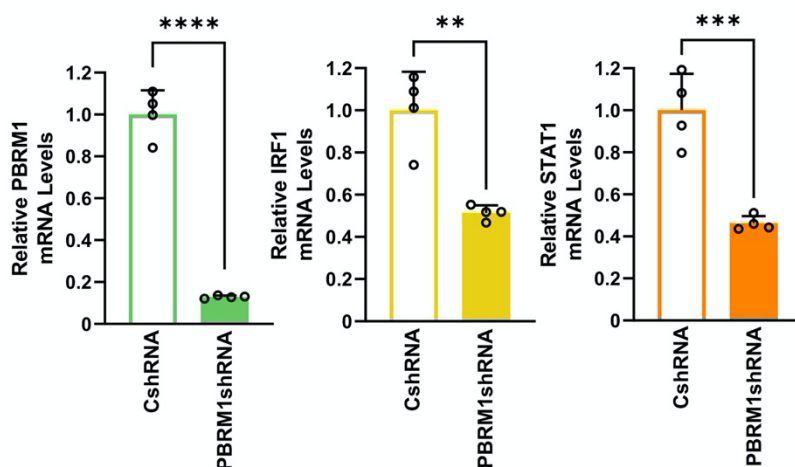

### F.

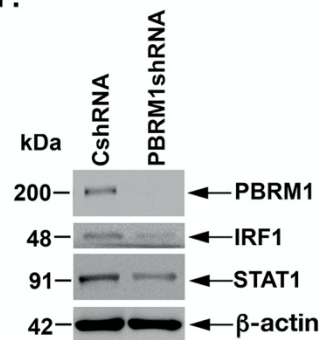

### Supplemental Figure S3. MUC1-C is necessary for PBRM1

**expression A and B.** MDA-MB-436/tet-MUC1shRNA cells treated with vehicle or DOX for 7 days were analyzed for PBRM1 mRNA levels using qRT-PCR (A). The results (mean±SD and individual values) are expressed as relative mRNA levels compared to those obtained in the control vehicle-treated cells (assigned a value of 1). Lysates were immunoblotted using antibodies against the indicated proteins (B). **C and D.** BT-549/CshRNA, BT-549/PBRM1shRNA, and BT-549/PBRM1shRNA#2 cells were analyzed for PBRM1, IRF1 and STAT1 mRNA levels by qRT-PCR (C). The results (mean±SD and individual values) are expressed as relative mRNA levels compared to those obtained in the control vehicle-treated cells (assigned a value of 1). Lysates were

immunoblotted using antibodies against the indicated proteins (**D**). **E** and **F**. MDA-MB-436/CshRNA and MDA-MB-436/PBRM1shRNA cells were analyzed for PBRM1, IRF1, and STAT1 mRNA levels using qRT-PCR (**E**). The results (mean $\pm$ SD and individual values) are expressed as relative mRNA levels compared to those obtained in the control vehicle-treated cells (assigned a value of 1). Lysates were immunoblotted using antibodies against the indicated proteins (**F**).

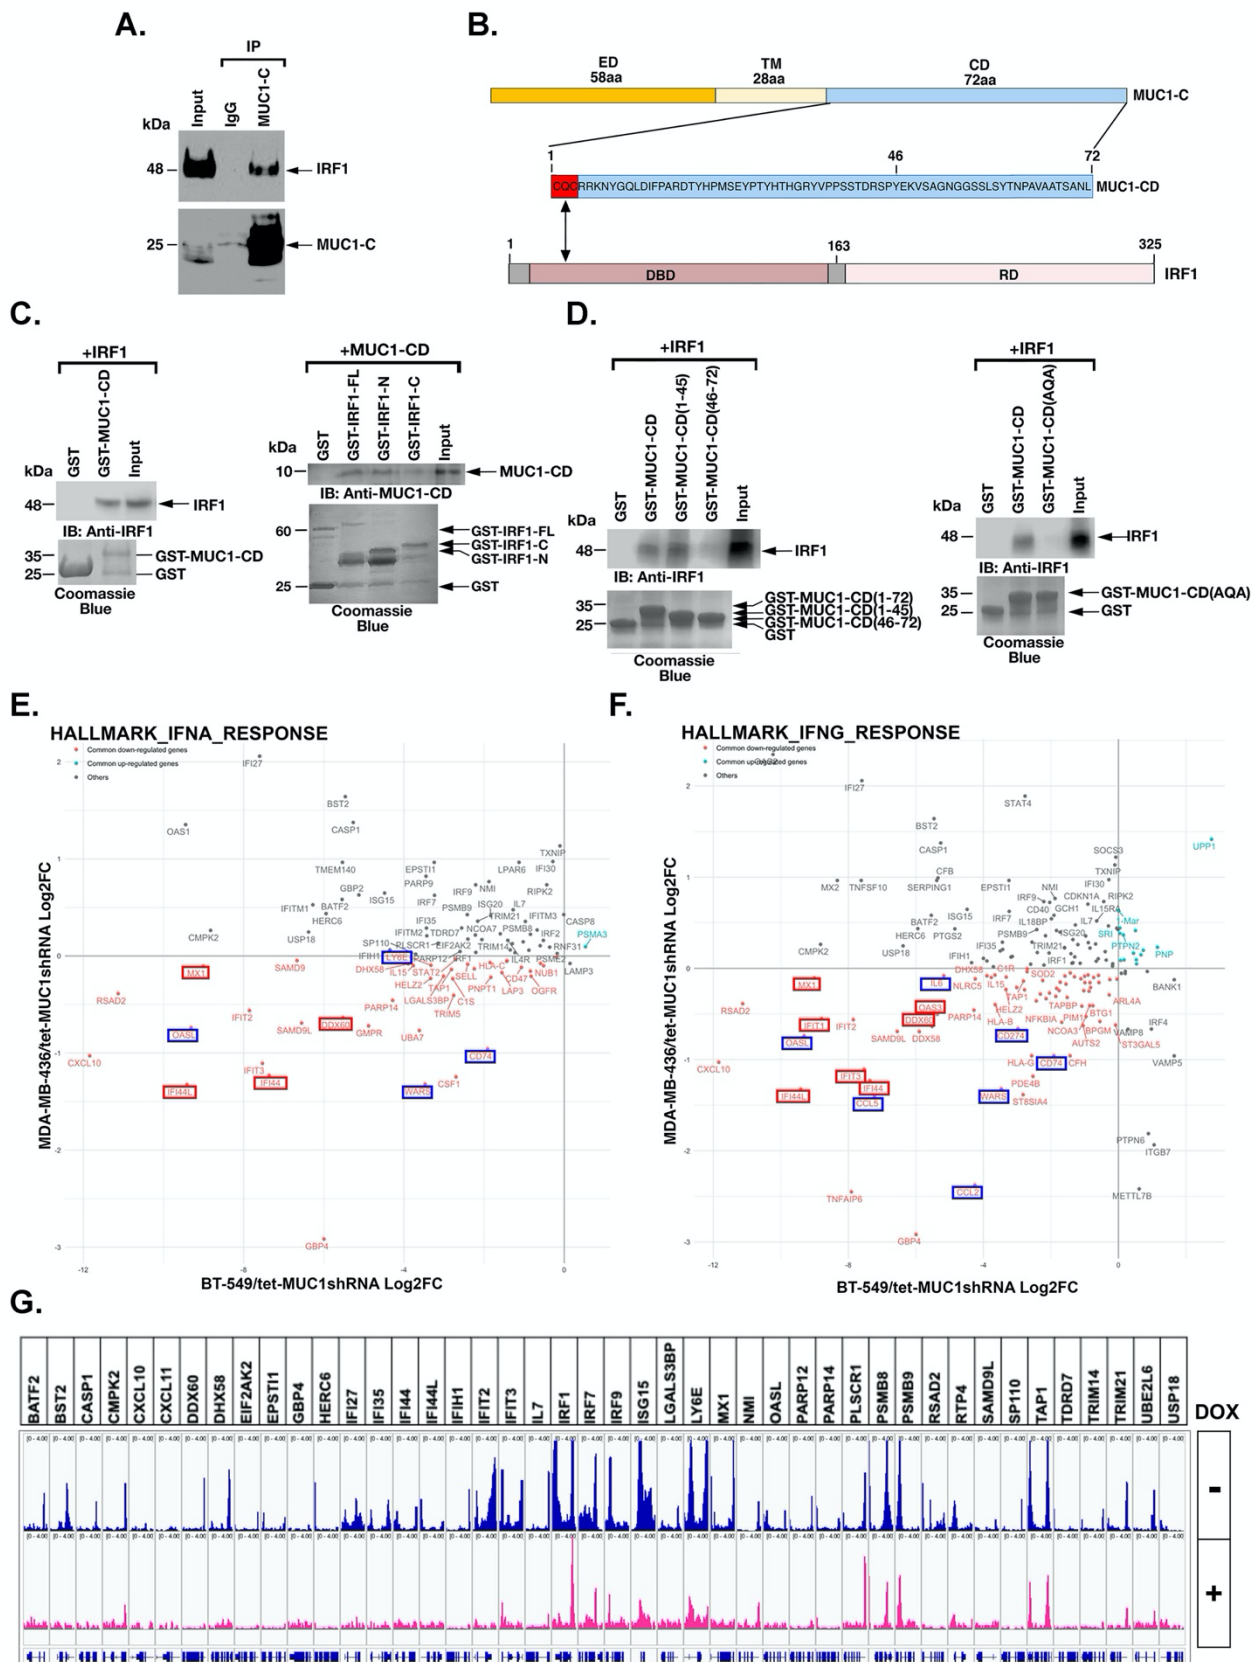

**Supplemental Figure S4. MUC1-C forms a direct complex with IRF1 that activates type I and II ISGs.** **A.** Nuclear lysates from BT-549 cells were precipitated with control IgG or anti-MUC1-C. Input proteins and precipitates were immunoblotted using antibodies against the indicated proteins. **B.** Schema of the MUC1-C protein with the amino acid sequence of the 72 aa cytoplasmic domain. Schema of the IRF1 325 aa protein highlighting regions of the DNA-binding (aa

1-163) and regulatory (aa 163-325) domains. **C.** GST and GST-MUC1-CD(FL; 1-72 aa) were incubated with purified IRF1(1-325)(left). The adsorbates and inputs were immunoblotted using anti-IRF1 antibody. GST, GST-IRF1(1-325), GST-IRF1-N(1-163) and GST-IRF1-C(163-325) were incubated with purified MUC1-CD(1-72)(right). The adsorbates and inputs were immunoblotted using an anti-MUC1-CD antibody. The input of GST proteins was assessed using Coomassie blue staining. **D.** GST, GST-MUC1-CD(FL; 1-72 aa), GST-MUC1-CD(1-45) and GST-MUC1-CD(45-72) were incubated with purified IRF1(1-325)(left). GST, GST-MUC1-CD, and GST-MUC1-CD( CQC to AQA mutation) were incubated with purified IRF1(1-325)(right). The adsorbates and inputs were immunoblotted using anti-IRF1 antibody. The input of GST proteins was assessed using Coomassie blue staining. **E and F.** Common MUC1-activated and -repressed genes in BT-549/tet-MUC1shRNA and MDA-MB-436/tet-MUC1shRNA cells treated with DOX for 7 days using HALLMARK IFNA (**E**) and IFNG (**F**) RESPONSE gene signatures. **G.** Genome browser snapshots of ATAC-seq data of 44 common MUC1-, IRF1-, and PBRM1-regulated genes in BT-549/tet-MUC1shRNA cells treated with vehicle or DOX for 7 days.



**A.**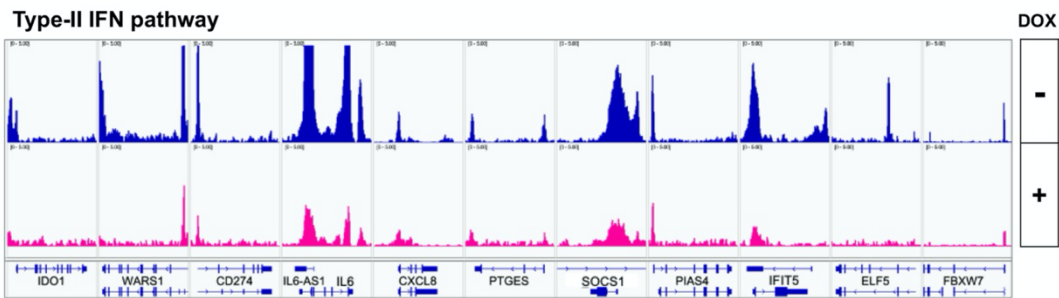**B.**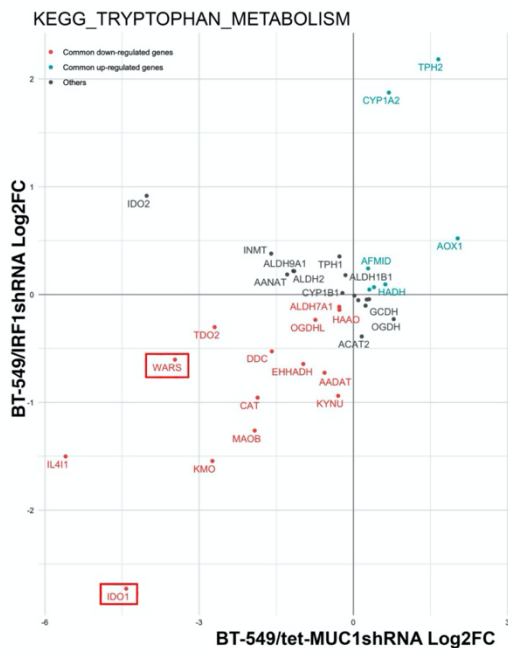**C.**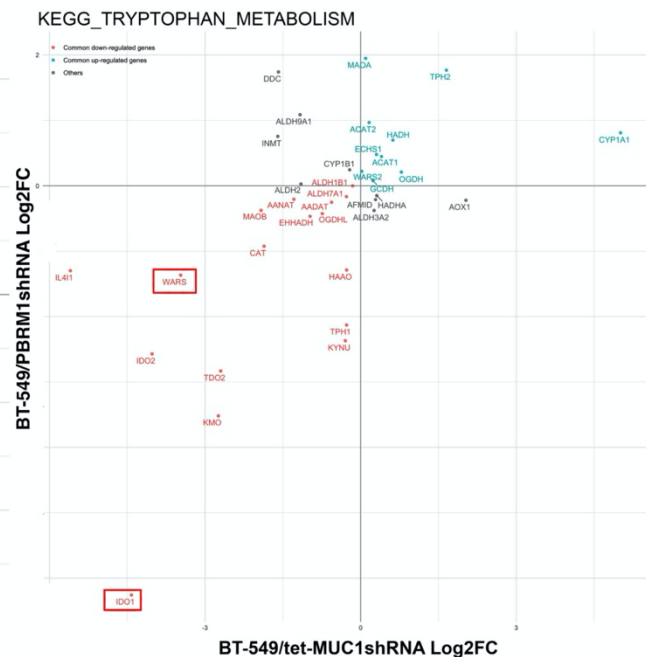

**Supplemental Figure S5. Common genes regulated in cells silenced for MUC1, IRF1, and PBRM1.** **A.** Genome browser snapshots of ATAC-seq data from the indicated type II IFN genes in BT-549/tet-MUC1shRNA cells treated with vehicle or DOX for 7 days. **B.** Common down- and upregulated genes in BT-549 cells with MUC1 and IRF1 silencing obtained from GSEA of the KEGG TRYPTOPHAN METABOLISM gene signature. **C.** Common down- and upregulated genes in BT-549 cells with MUC1 and PBRM1 silencing obtained from GSEA of the KEGG TRYPTOPHAN METABOLISM gene signature. Highlighted are IDO1 and WARS, which were downregulated by MUC1-C, IRF1, and PBRM1 silencing.



### A. BT-549/tet-MUC1shRNA

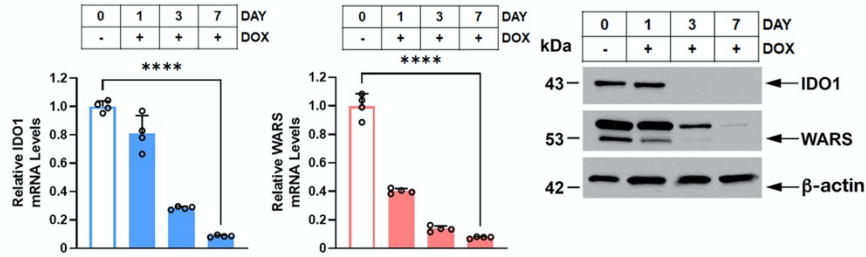

### B. BT-549

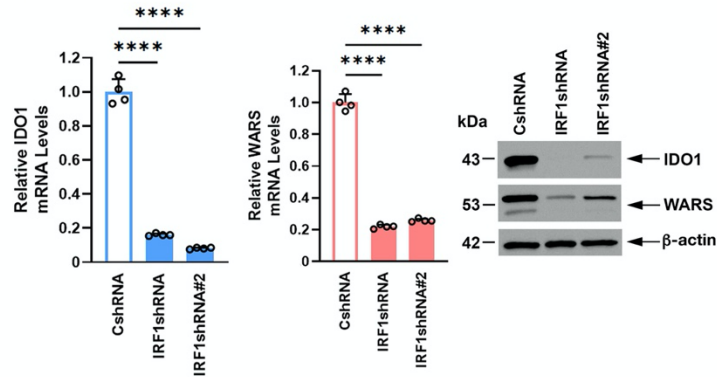

### C. BT-549

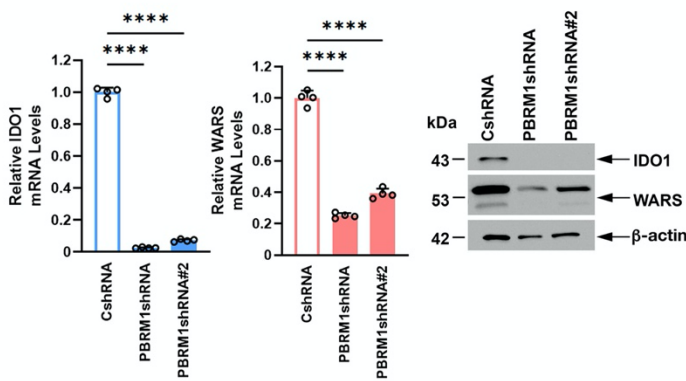

### D. MDA-MB-436/tet-MUC1shRNA

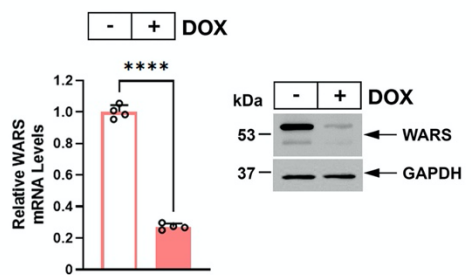

### E. MDA-MB-436

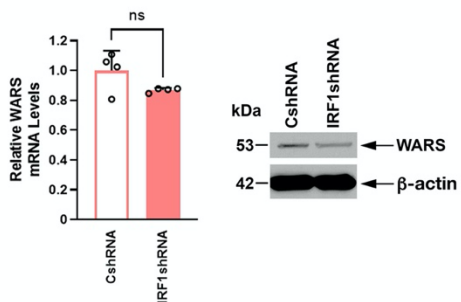

### F. MDA-MB-436

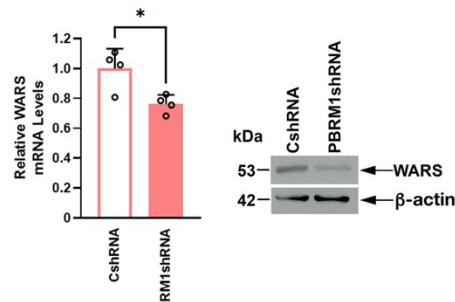

**Supplemental Figure S6. Silencing MUC1-C, IRF1, and PBRM1 downregulated IDO1 and WARS in TNBC cells.** **A.** BT-549/tet-MUC1shRNA cells treated with vehicle or DOX for the indicated days were analyzed for IDO1 and WARS mRNA levels using qRT-PCR (left). The results (mean±SD and individual values) are expressed as relative mRNA levels compared to those obtained in the control-treated cells (assigned a value of 1). Lysates were immunoblotted using antibodies against the indicated proteins (right). **B.** BT-549/CshRNA, BT-549/IRF1shRNA, and BT-549/IRF1shRNA#2 cells were analyzed for IDO1 and WARS mRNA levels using qRT-PCR (left). The results (mean±SD and individual values) are expressed as relative mRNA levels compared

with those obtained in CshRNA cells (assigned a value of 1). Lysates were immunoblotted using antibodies against the indicated proteins (right). **C.** BT-549/CshRNA, BT-549/PBRM1shRNA, and BT-549/PBRM1shRNA#2 cells were analyzed for IDO1 and WARS mRNA levels using qRT-PCR (left). The results (mean $\pm$ SD and individual values) are expressed as relative mRNA levels compared with those obtained in CshRNA cells (assigned a value of 1). Lysates were immunoblotted using antibodies against the indicated proteins (right). **D.** MDA-MB-436/tet-MUC1shRNA cells treated with vehicle or DOX for the indicated days were analyzed for WARS mRNA levels using qRT-PCR (left). The results (mean $\pm$ SD and individual values) are expressed as relative mRNA levels compared with those obtained in vehicle-treated cells (assigned a value of 1). Lysates were immunoblotted using antibodies against the indicated proteins (right). **E.** MDA-MB-436/CshRNA, MDA-MB-436/IRF1shRNA, and MDA-MB-436/IRF1shRNA#2 cells were analyzed for WARS mRNA levels using qRT-PCR (left). The results (mean $\pm$ SD and individual values) are expressed as relative mRNA levels compared with those obtained in CshRNA cells (assigned a value of 1). Lysates were immunoblotted using antibodies against the indicated proteins (right). **F.** MDA-MB-436/CshRNA and MDA-MB-436/PBRM1shRNA cells were analyzed for WARS mRNA levels using qRT-PCR (left). The results (mean $\pm$ SD and individual values) are expressed as relative mRNA levels compared with those obtained in CshRNA cells (assigned a value of 1). Lysates were immunoblotted using antibodies against the indicated proteins (right).

## A. BT-549/tet-MUC1shRNA

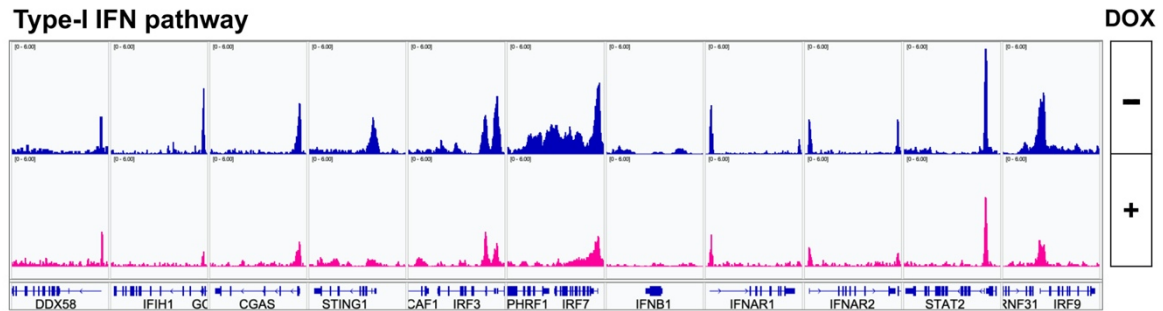

## B. BT-549/tet-MUC1shRNA

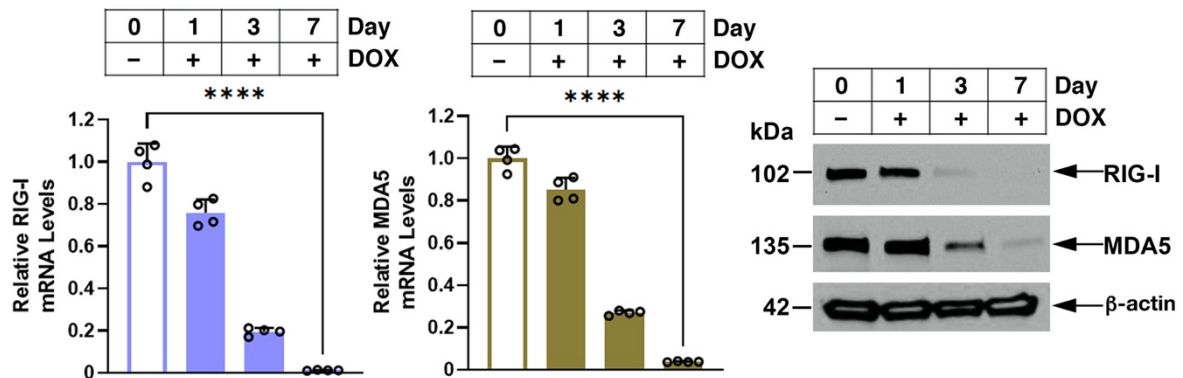

## C. BT-549

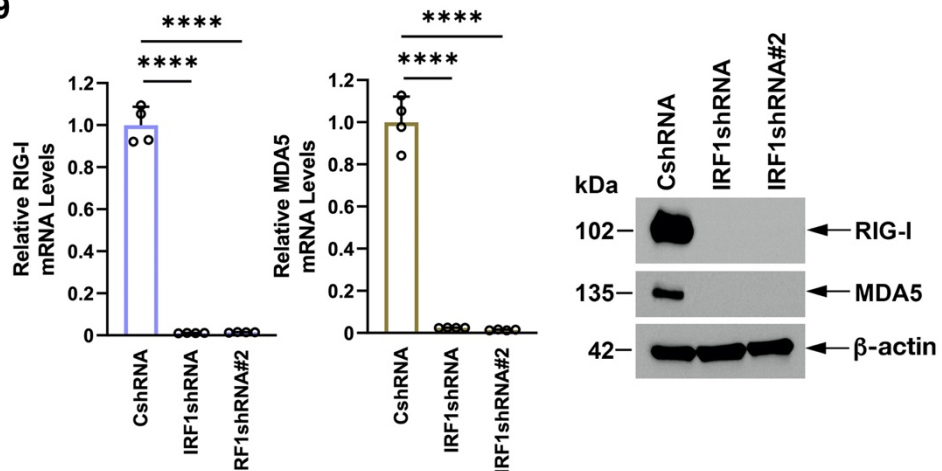

**Supplemental Figure S7. Silencing of MUC1-C, IRF1, and PBRM1 downregulates RIG-I and MDA5 in TNBC cells.** **A.** Genome browser snapshots of ATAC-seq data from the indicated type I IFN genes in BT-549/tet-MUC1shRNA cells treated with vehicle or DOX for 7 days. **B.** BT-549/tet-MUC1shRNA cells treated with vehicle or DOX for the indicated days were analyzed for RIG-I and MDA5 mRNA levels using qRT-PCR (left). The results (mean±SD and individual values) are expressed as relative mRNA levels compared with those obtained in vehicle-treated cells (assigned a value of 1). Lysates were immunoblotted using antibodies against the indicated proteins (right). **C.** BT-549/CshRNA, BT-549/IRF1shRNA, and BT-549/IRF1shRNA#2 cells were analyzed for RIG-I and MDA5 mRNA levels using qRT-PCR (left). The results (mean±SD and individual values) are expressed as relative mRNA levels compared with those obtained in CshRNA cells (assigned a value of 1). Lysates were immunoblotted using antibodies

against the indicated proteins (right). **D.** BT-549/CshRNA, BT-549/PBRM1shRNA, and BT-549/PBRM1shRNA#2 cells were analyzed for RIG-I and MDA5 mRNA levels using qRT-PCR (left). The results (mean $\pm$ SD and individual values) are expressed as relative mRNA levels compared with those obtained in CshRNA cells (assigned a value of 1). Lysates were immunoblotted using antibodies against the indicated proteins (right). **E.** MDA-MB-436/tet-MUC1shRNA cells treated with vehicle or DOX for the indicated number of days were analyzed for RIG-I and MDA5 mRNA levels by qRT-PCR (left). The results (mean $\pm$ SD and individual values) are expressed as relative mRNA levels compared with those obtained in vehicle-treated cells (assigned a value of 1). Lysates were immunoblotted using antibodies against the indicated proteins (right). **F.** MDA-MB-436/CshRNA, MDA-MB-436/IRF1shRNA and MDA-MB-436/IRF1shRNA#2 cells were analyzed for RIG-I and MDA5 mRNA levels by qRT-PCR (left). The results (mean $\pm$ SD and individual values) are expressed as relative mRNA levels compared with those obtained in CshRNA cells (assigned a value of 1). Lysates were immunoblotted using antibodies against the indicated proteins (right). **G.** MDA-MB-436/CshRNA, MDA-MB-436/PBRM1shRNA and MDA-MB-436/PBRM1shRNA#2 cells were analyzed for RIG-I and MDA5 mRNA levels by qRT-PCR (left). The results (mean $\pm$ SD and individual values) are expressed as relative mRNA levels compared with those obtained in CshRNA cells (assigned a value of 1). Lysates were immunoblotted using antibodies against the indicated proteins (right).

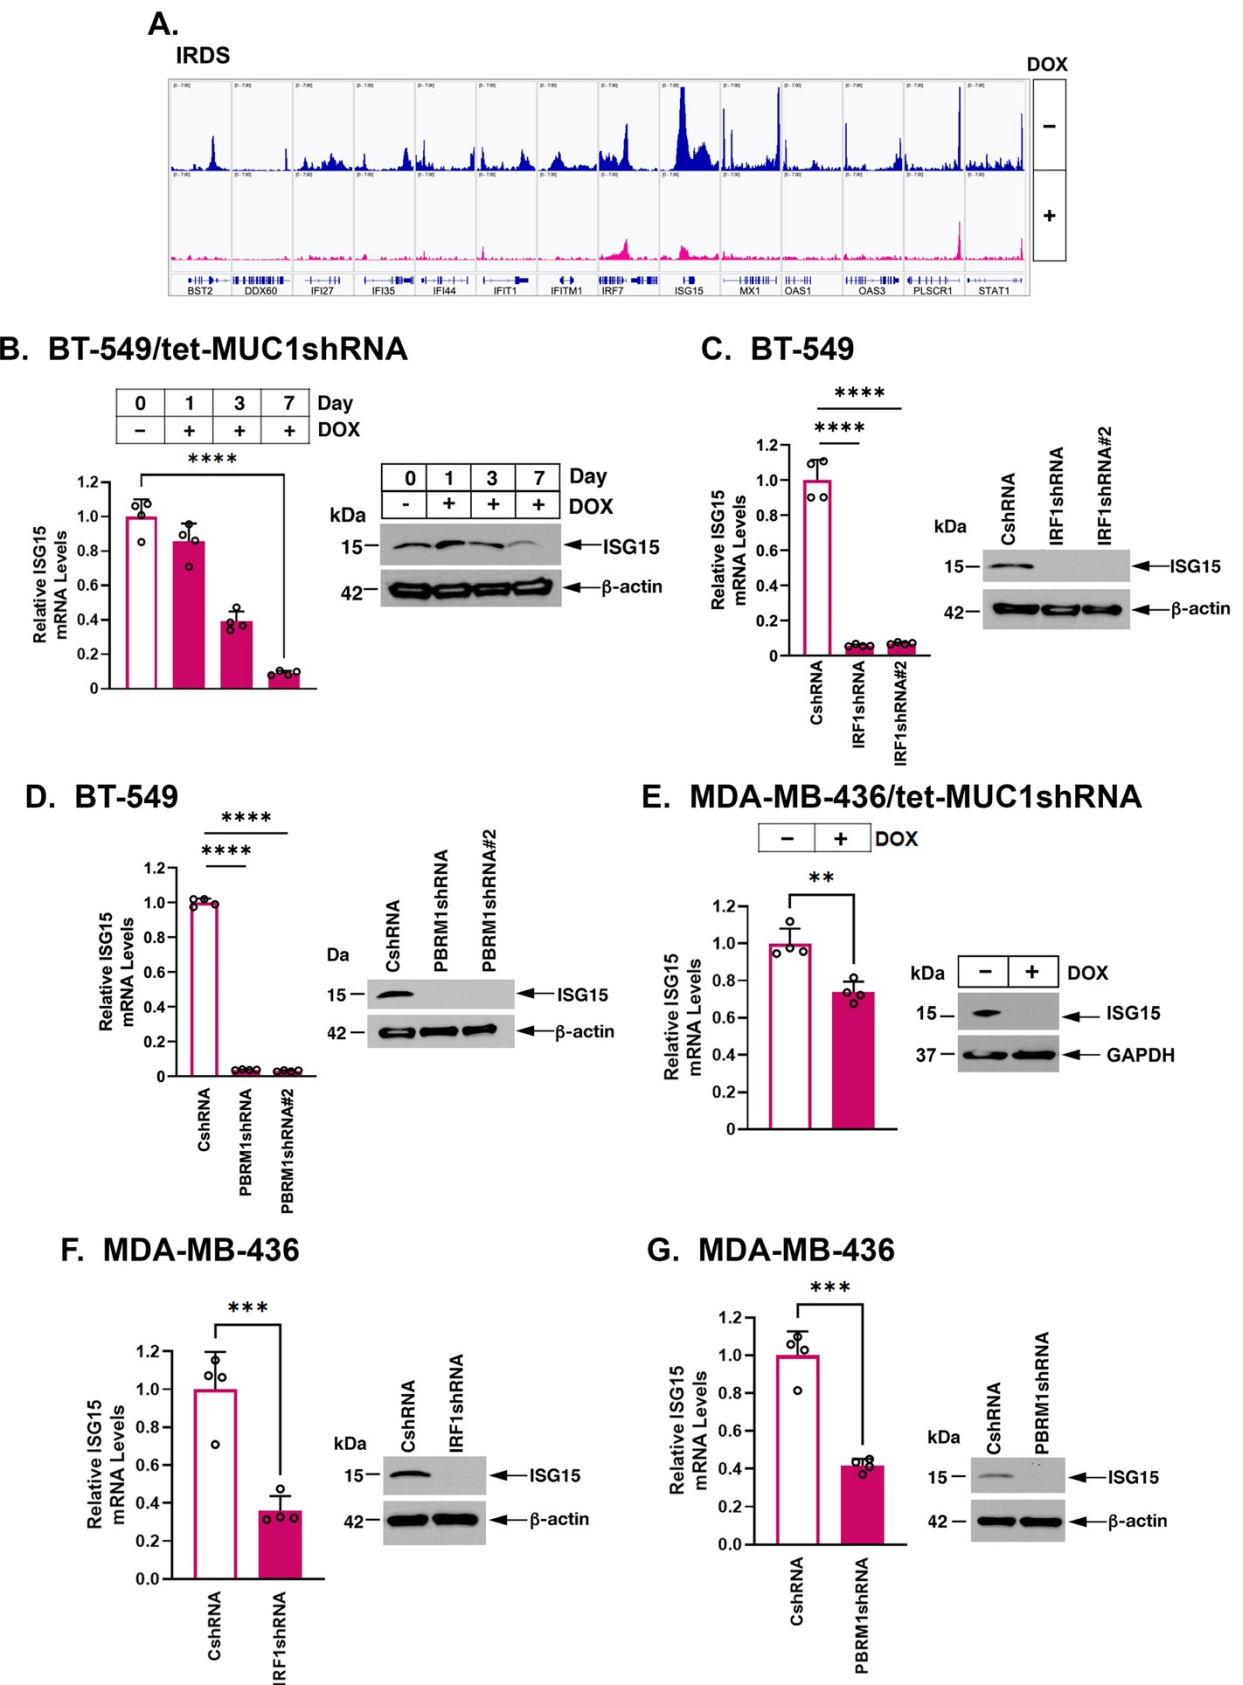

**Supplemental Figure S8. Silencing MUC1-C, IRF1, and PBRM1 downregulates ISG15 expression in TNBC cells.** **A.** Genome browser snapshots of ATAC-seq data from the indicated IRDS genes in BT-549/tet-MUC1shRNA cells treated with vehicle or DOX for seven days. **B.** BT-549/tet-MUC1shRNA cells treated with vehicle or DOX for the indicated days were analyzed for ISG15 mRNA levels using qRT-PCR (left). The results (mean±SD and individual values) are expressed as

relative mRNA levels compared with those obtained in vehicle-treated cells (assigned a value of 1). Lysates were immunoblotted using antibodies against the indicated proteins (right). **C.** BT-549/CshRNA, BT-549/IRF1shRNA, and BT-549/IRF1shRNA#2 cells were analyzed for ISG15 mRNA levels using qRT-PCR (left). The results (mean $\pm$ SD and individual values) are expressed as relative mRNA levels compared with those obtained in CshRNA cells (assigned a value of 1). Lysates were immunoblotted using antibodies against the indicated proteins (right). **D.** BT-549/CshRNA, BT-549/PBRM1shRNA, and BT-549/PBRM1shRNA#2 cells were analyzed for ISG15 mRNA levels using qRT-PCR (left). The results (mean $\pm$ SD and individual values) are expressed as relative mRNA levels compared with those obtained in CshRNA cells (assigned a value of 1). Lysates were immunoblotted using antibodies against the indicated proteins (right). **E.** MDA-MB-436/tet-MUC1shRNA cells treated with vehicle or DOX for the indicated number of days were analyzed for ISG15 mRNA levels by qRT-PCR (left). The results (mean $\pm$ SD and individual values) are expressed as relative mRNA levels compared with those obtained in vehicle-treated cells (assigned a value of 1). Lysates were immunoblotted using antibodies against the indicated proteins (right). **F.** MDA-MB-436/CshRNA, MDA-MB-436/IRF1shRNA, and MDA-MB-436/IRF1shRNA#2 cells were analyzed for ISG15 mRNA levels using qRT-PCR (left). The results (mean $\pm$ SD and individual values) are expressed as relative mRNA levels compared with those obtained in CshRNA cells (assigned a value of 1). Lysates were immunoblotted using antibodies against the indicated proteins (right). **G.** MDA-MB-436/CshRNA, MDA-MB-436/PBRM1shRNA, and MDA-MB-436/PBRM1shRNA#2 cells were analyzed for ISG15 mRNA levels using qRT-PCR (left). The results (mean $\pm$ SD and individual values) are expressed as relative mRNA levels compared with those obtained in CshRNA cells (assigned a value of 1). Lysates were immunoblotted using antibodies against the indicated proteins (right).

### A. BT-549

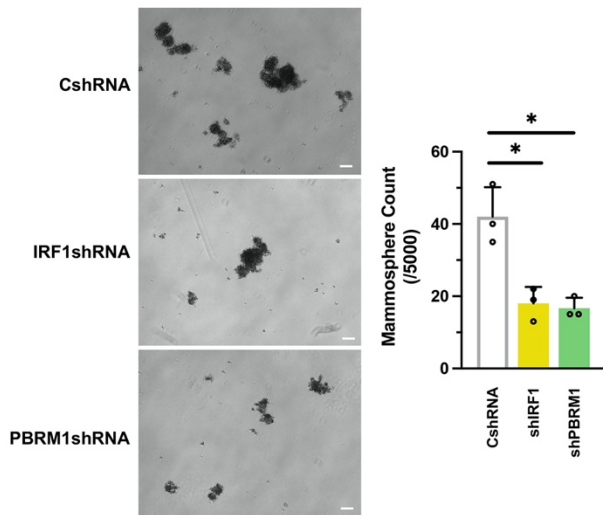

### B. BT-549

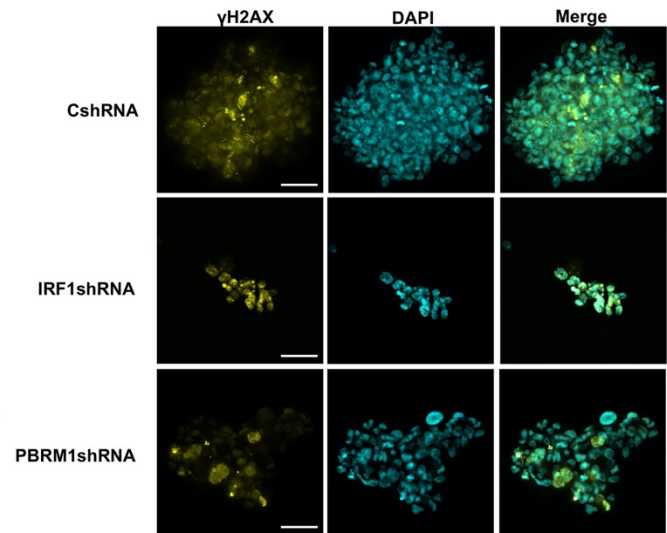

### C. MDA-MB-436

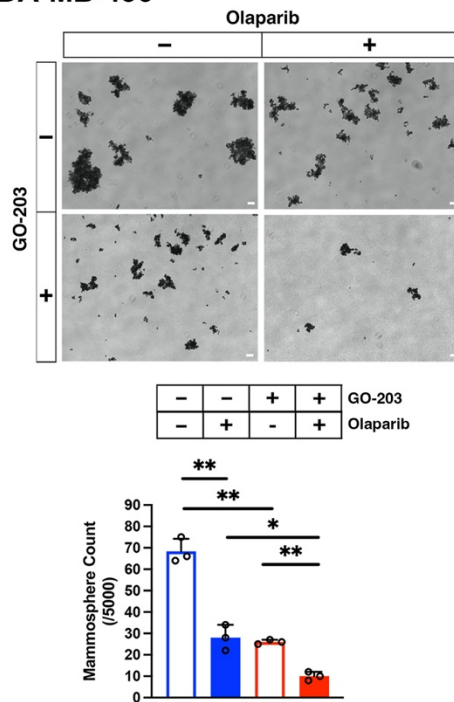

### D. MDA-MB-436

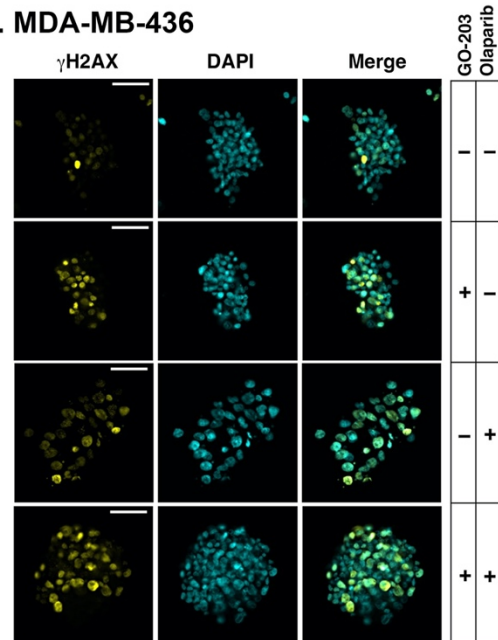

### E. MDA-MB-436

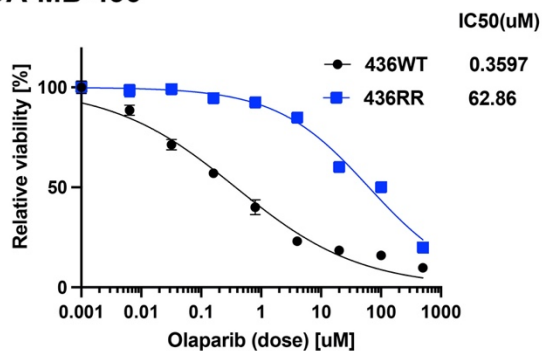

### F. MDA-MB-436 RR

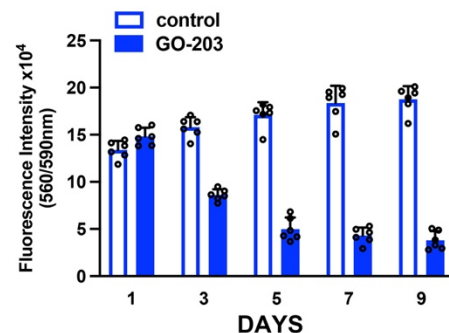

**Supplemental Figure S9. Effects of silencing IRF1 and PBRM1 on BT-549 mammosphere formation and GO-203 treatment on the viability of olaparib-resistant MDA-MB-436RR cells. A and B.** BT-549/CshRNA, BT-549/IRF1shRNA, and BT-549/PBRM1shRNA cells were assayed for mammosphere formation on day 7 (A, left). Scale bar: 100  $\mu$ m. The



results (mean  $\pm$  SD of three biological replicates) are expressed as the number of mammospheres (**A**, right panel). The indicated mammospheres were assayed by ICC analysis to visualize  $\gamma$ H2AX foci (**B**). Scale bar:50  $\mu$ m. **C**. MDA-MB-436 cells treated with vehicle or 1  $\mu$ M GO-203 in the absence and presence of 5  $\mu$ M olaparib were assayed for mammosphere formation at 8 days (left). Scale bar: 100  $\mu$ m. The results (mean+SD of 3 biological replicates) are expressed as the number of mammospheres (right). **D**. MDA-MB-436 mammospheres treated with vehicle or 2.5  $\mu$ M GO-203 in the absence and presence of 1  $\mu$ M for 2 days were assayed by ICC analysis for visualization of  $\gamma$ H2AX foci. Scale bar:50  $\mu$ m. **E**. MDA-MB-436 and MDA-MB-436RR cells were treated with olaparib at the indicated concentrations for five days. Cell viability was determined using the Alamar Blue assay. **F**. MDA-MB-436RR cells were treated with 5  $\mu$ M GO-203 for the indicated times. Fluorescence intensity (560/590 nm) was expressed as the mean  $\pm$  SD of six measurements.

**Table S1. Primers used for qRT-PCR.**

| <b>Primer</b>                   | <b>FWD</b>              | <b>REV</b>             |
|---------------------------------|-------------------------|------------------------|
| <b>MUC1-C</b>                   | AGACGTCAGCGTGAGTGATG    | GCCAAGGCAATGAGATAGAC   |
| <b>PBRM1</b>                    | AAGAAGAAAGAGCTTGCCAG    | TCTCGAGCTTCAAGAACAAC   |
| <b>ARID2</b>                    | GCAGCCAATTTCCACTCCTGTTG | GATTGGTGACAGGAGTCCTCTG |
| <b>STAT1</b>                    | GGAACTTGATGGCCCTAAAGGA  | ACAGAGCCCACTATCCGAGACA |
| <b>IRF1</b>                     | CATGGCTGGGACATCAACAA    | TTGTATCGGCCTGTGTGAATG  |
| <b>IDO1</b>                     | TCTCATTTTCGTGATGGAGACT  | GTGTCCCGTTCTTGCATTTGC  |
| <b>WARS</b>                     | TGACGGATGACGAGAAGTATCT  | GCCGAAAATGCCTTTCCTTG   |
| <b>RIG-I</b>                    | CTGGACCCTACCTACATCCTG   | GGCATCCAAAAGCCACGG     |
| <b>MDA5</b>                     | CCATGGAGAAGGCTGGGG      | CAAAGTTGTCATGGATGACC   |
| <b>ISG15</b>                    | CGCAGATCACCCAGAAGATCG   | TTCGTTCGCATTTGTCCACCA  |
| <b><math>\beta</math>-actin</b> | GATGAGATTGGCATGGCTTT    | CACCTTCACCGTTCCAGTTT   |

**Supplemental Table S2. Primers used for ChIP-qPCR and DNase I chromatin accessibility assays.**

| <b>Primer</b>        | <b>FWD</b>              | <b>REV</b>             |
|----------------------|-------------------------|------------------------|
| <b>pIRF1_dELS_DN</b> | TGCTGGGTAGTGTTTATGCC    | TGGAAGGTGTGGATATGTGC   |
| <b>pIRF1_PLS</b>     | TTCGCCGCTAGCTCTAC       | GCCGCGGGGCGCCATT       |
| <b>pIRF1_dELS_UP</b> | GAAAAGCCCCACCTGAATG     | GTCCATCCTTCACACCCC     |
| <b>pPBRM1_PLS</b>    | GAACCGTCAAGAAACCACAAC   | GTTTCCCTCAGTCCCCAATAC  |
| <b>pSTAT1</b>        | ATGCTTCCGAGCTGTCAAGT    | TGTTGCTAAACCCAGGGAAC   |
| <b>pIDO1</b>         | TGCACAGAGATGCTTTTGTGG   | GCCAGTGACCACAGTTTATCAC |
| <b>pWARS</b>         | GAACAGATGCGGGAATTTA     | CGAGCCATTAGCTGGTCATT   |
| <b>pRIG1</b>         | GGAGGGAAACGAAACTAGCC    | TTAAAGCCGGGTAGGAGGAG   |
| <b>pMDA5</b>         | CTTTGTAAACGTAATCTGCCTGG | GCTTTCCTTTTCTGTTTCCCG  |
| <b>pISG15</b>        | CGGTTTTGTTTCTTCCGCTCA   | AGCACCGGCCCTATTATAAGC  |

**Supplemental Table S3. Common downregulated 196 DEGs in BT-549 cells with silencing of MUC1, IRF1, and PBRM1.**

|          |          |          |         |          |         |          |             |
|----------|----------|----------|---------|----------|---------|----------|-------------|
| CX3CL1   | PLEKHA4  | GALNT12  | CMPK2   | PPFIA4   | IGFBP6  | TCN2     | HLA-E       |
| ETV7     | GIMAP2   | IFIT3    | OASL    | GRIP2    | TRANK1  | SP140L   | HLA-F       |
| TNFRSF1B | TRIM14   | IFIT2    | LMO2    | PLEKHS1  | BATF2   | IRF7     | PSMB10      |
| EIF2AK2  | CA9      | TNFSF10  | SP110   | SERPING1 | TAP1    | IFIT1    | SAMD9       |
| PARP12   | DDX58    | GLIPR2   | PHF11   | CCDC3    | MLKL    | TRIM69   | KRT81       |
| LZTS1    | ACTA2    | EGR2     | GPNMB   | IFIT5    | HR      | IFITM1   | GBP7        |
| SP100    | MAP3K8   | NMI      | IL6     | GBP5     | PCSK9   | BTN3A2   | IRF9        |
| IFI35    | LGALS3BP | KCNJ2    | ADAMTS7 | UBE2L6   | CXCL10  | PLCD1    | SMTNL1      |
| TP63     | DHX58    | IRF1     | RTP4    | KCNJ15   | CXCL11  | ISG15    | PLXNA4      |
| CA12     | MAP2K6   | IFI6     | FHDC1   | MX1      | LRRN2   | HES4     | APOL6       |
| ACTN2    | SLC15A3  | APOL3    | LRRC32  | ZNF618   | MYD88   | PLSCR1   | GBP1P1      |
| MOXD1    | OAS3     | APOBEC3F | DDX60   | TNFRSF14 | PARP14  | H1F0     | NRIR        |
| IGSF9    | OAS2     | ISLR     | CASP1   | LY6E     | FZD4    | PAX5     | RPS6KA2-IT1 |
| OAS1     | BTN3A3   | APOE     | IFI44L  | USP41    | SAMD9L  | TDRD7    | LINC02574   |
| TBX15    | MDGA1    | BST2     | IFI44   | CXCL16   | CALHM5  | ARL9     | LINC01914   |
| IL12RB1  | TRIM38   | SHFL     | CH25H   | GBP4     | PARP10  | ACSL5    | HLA-B       |
| TSPAN15  | ST8SIA4  | IDO1     | PARP9   | IGFBP7   | PCGF5   | UAP1L1   | APOBEC3G    |
| APOL1    | PLSCR4   | TRIM21   | HERC6   | DTX3L    | MUC16   | SLC28A3  | PSMB9       |
| MYL9     | IFIH1    | TRIM22   | HERC5   | ERAP2    | DDX60L  | C5orf56  | LY6E-DT     |
| TLDC2    | GCA      | XAF1     | PRKG2   | TLR3     | TNFSF15 | PLCG2    | CCL5        |
| SAMHD1   | STAT1    | ACY3     | NLRC5   | HNF4G    | UBA7    | TMEM229B | BISPR       |
| QPRT     | KMO      | KANK4    | PMAIP1  | KCNV1    | BGN     | IFIT1B   |             |
| IL7      | GBP3     | EPSTI1   | PGGHG   | AQP3     | TMEM173 | PSMB8    |             |
| FCGRT    | GBP1     | PLAAT4   | IL22RA1 | IFI27    | RBM43   | COL15A1  |             |
| IL4I1    | CDK18    | RSAD2    | LHX9    | B2M      | USP18   | CARD16   |             |

**Supplemental Table S4. Overlapping IFN-pathway genes  
downregulated in cells with MUC1-C, PBRM1, and IRF1 silencing.**

|          |
|----------|
| B2M      |
| BATF2    |
| BST2     |
| CASP1    |
| CMPK2    |
| CXCL10   |
| CXCL11   |
| DDX60    |
| DHX58    |
| EIF2AK2  |
| EPSTI1   |
| GBP4     |
| HERC6    |
| IFI27    |
| IFI35    |
| IFI44    |
| IFI44L   |
| IFIH1    |
| IFIT2    |
| IFIT3    |
| IL7      |
| IRF1     |
| IRF7     |
| IRF9     |
| ISG15    |
| LGALS3BP |
| LY6E     |
| MX1      |
| NMI      |
| OASL     |
| PARP12   |
| PARP14   |
| PLSCR1   |
| PSMB8    |
| PSMB9    |
| RSAD2    |
| RTP4     |
| SAMD9L   |
| SP110    |
| TAP1     |
| TDRD7    |
| TRIM14   |
| TRIM21   |
| UBE2L6   |
| USP18    |
